# Supplementary material for: Parathyroidectomy Protects Against Pathologic Fractures After Kidney Transplantation: Results From a Retrospective Single-center Trial
Source: Research Square preprint supplement (doi:10.21203/rs.3.rs-571514/v1), 2021-06-07
Supplement: Supplementary file 1 [file 9ef8a43268961168617de9da.docx]

**Supplements:**


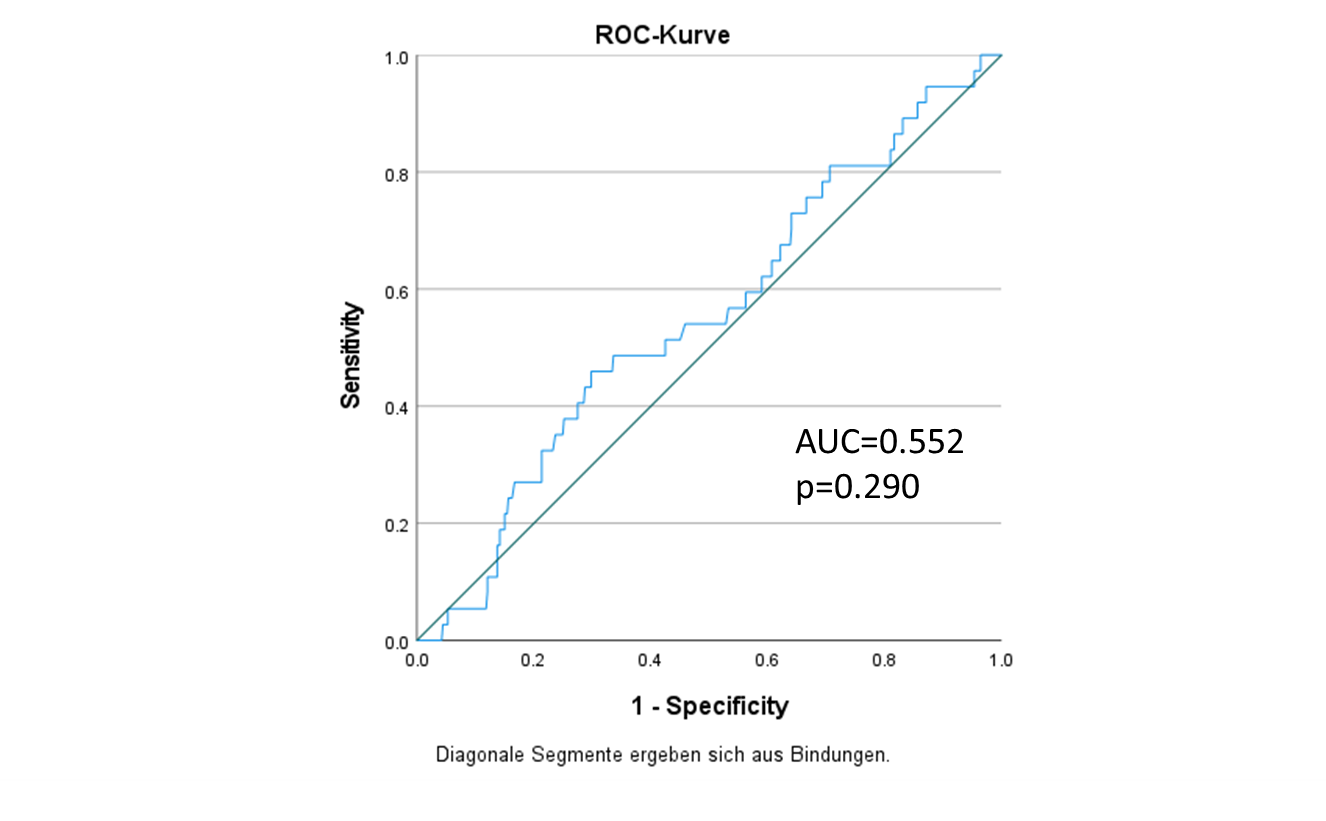


**Suppl. Fig. 1:** ROC-analysis for PTH levels three months after KTx and fracture occurrence. Based on this, we could not support a cut-off for PTH being associated with an increased fracture risk.
